# Supplementary material for: Aberrant DNA Methylation Is Associated with Disease Progression, Resistance to Imatinib and Shortened Survival in Chronic Myelogenous Leukemia
Source: PLoS One. 2011 Jul 8;6(7):e22110. doi: 10.1371/journal.pone.0022110 (PMC3132778; doi:10.1371/journal.pone.0022110)
Supplement: Table S1 — Bisulfite PCR and pyrosequencing primers. (XLS) [file pone.0022110.s001.xls]

## Sheet: Sheet1
Supplementary Table 1: Bisulfite PCR and pyrosequencing primers
Gene	ABL1
PCR1	Forward	TGGAGTGGAGTAGGTTTGTATTT
	Reverse	ACCCCCCAAAATCTTTCT
	Universal-tagged-reverse	GGGACACCGCTGATCGTTTACCCCCCAAAATCTTTCT
Annealing temperature		56C
PCR2	Forward	TGGAGTGGAGTAGGTTTGTATTT
	Reverse	Biotin-GGGACACCGCTGATCGTTTA
Annealing temperature		56C
Pyrosequencing primer		TTAGTAGGGGTTGGGA
Gene	CDH13
PCR1	Forward	TTTGGGAAGTTGGTTGGTTG
	Reverse	ACAACCCCTCTTCCCTACct
Annealing temperature		60C
PCR2	Forward	AGTTTGGTTTTTAAGGAAAATATGTTTAGT
	Reverse	Biotin-AACCAAATTCTCCACTACATTTTATCC
Annealing temperature		56C
Pyrosequencing primer		AGGAAAATATGTTTAGTGTA
Gene	CDKN2B
PCR1	Forward	AGTTTAAGGGGGTGGGGAGA
	Reverse	AAAACCTAAACTCAACTTCATTACCC
Annealing temperature		60C
PCR2	Forward	TGGAGTGGAGTAGGTTTGTATTT
	Reverse	Biotin-TCCTTCTACCACTTAAAACC
Annealing temperature		56C
Pyrosequencing primer		TTTTTAGAAGTAATTTAGG
Gene	DPYS
PCR1	Forward	GGGTTTGAGTGTGTAAGGA
	Reverse	CCAACTTAAAATACCCTCCTACA
	Universal-tagged-reverse	GGGACACCGCTGATCGTTTACCAACTTAAAATACCCTCCTACA
Annealing temperature		56C
PCR2	Forward	GGGTTTGAGTGTGTAAGGA
	Reverse	Biotin-GGGACACCGCTGATCGTTTA
Annealing temperature		56C
Pyrosequencing primer		TATATGAGGTTAGGTTATAAA
Gene	NPM2
PCR1	Forward	AGGAGGAAAGAATGGGAGAAGGG
	Reverse	CCCCCCACACAACCTTACTAT
	Universal-tagged-reverse	GGGACACCGCTGATCGTTTACCCCCCACACAACCTTACTAT
Annealing temperature		60C
PCR2	Forward	AGGTTTTTTAGTTAGGGTTTGGATAGT
	Reverse	Biotin-GGGACACCGCTGATCGTTTA
Annealing temperature		56C
Pyrosequencing primer		GTTAGAGGGGATGAGGT
Gene	OSCP1
PCR1	Forward	GAGTTGGATTGGTGAAGAGTT
	Reverse	CCAAACCCCCTTCTAATT
	Universal-tagged-reverse	GGGACACCGCTGATCGTTTACCAAACCCCCTTCTAATT
Annealing temperature		60C
PCR2	Forward	GGGGTTAGGTAGTTAGTGG
	Reverse	Biotin-GGGACACCGCTGATCGTTTA
Annealing temperature		56C
Pyrosequencing primer		TTAGGTTGTTGGGGTAA
Gene	PDLIM4
PCR1	Forward	TTTGTGAGTTTGGATTGGT
	Reverse	CCCCAAATAAACCCTCCAT
	Universal-tagged-reverse	GGGACACCGCTGATCGTTTACCCCAAATAAACCCTCCAT
Annealing temperature		56C
PCR2	Forward	TTTGTGAGTTTGGATTGGT
	Reverse	Biotin-GGGACACCGCTGATCGTTTA
Annealing temperature		56C
Pyrosequencing primer		TTTATTTAGTTTTTAGAGAT
Gene	PGR-A
PCR1	Forward	GGAGGAGAAAAGGGGAGTTTA
	Reverse	aaatcctatccctaacaaaa
	Universal-tagged-reverse	GGGACACCGCTGATCGTTTAaaatcctatccctaacaaaa
Annealing temperature		60C
PCR2	Forward	ATTGAGTTGAAGGTAAAGGGTTT
	Reverse	Biotin-GGGACACCGCTGATCGTTTA
Annealing temperature		56C
Pyrosequencing primer		GGATTTTTATTGTTGTGT
Gene	PGR-B
PCR1	Forward	TGTGGGTGGTATTTTTAATGAGA
	Reverse	ccccctcactaaaaccctaaa
Annealing temperature		60C
PCR2	Forward	GAGAATTAGTTTTATTTGTTATTTGAGTGA
	Reverse	Biotin-CAACCCATTCCCAAAAAAAATC
Annealing temperature		56C
Pyrosequencing primer		GGGATTTGAGATTTT
Gene	TFAP2E
PCR1	Forward	GTGGGTTGAATTTAAGTTTTTTATTTATTTTAT
	Reverse	CCTCTAAACCTAACCTACTCCATACAC
	Universal-tagged-reverse	GGGACACCGCTGATCGTTTACTAAACCTAACCTACTCCATACAC
Annealing temperature		56C
PCR2	Forward	GGGGAAAAGGGAGAGAAT
	Reverse	Biotin-GGGACACCGCTGATCGTTTA
Annealing temperature		56C
Pyrosequencing primer		TGTTATAGTTTGTTTTTTTAATG
LINE-1 repetitive element
PCR	Forward	TTTTGAGTTAGGTGTGGGATATA
	Reverse	Biotin-AAAATCAAAAAATTCCCTTTC
Annealing temperature		56C
Pyrosequencing primer		agttaggtgtgggatatagt
