# Supplementary material for: Aberrant DNA Methylation Is Associated with Disease Progression, Resistance to Imatinib and Shortened Survival in Chronic Myelogenous Leukemia
Source: PLoS One. 2011 Jul 8;6(7):e22110. doi: 10.1371/journal.pone.0022110 (PMC3132778; doi:10.1371/journal.pone.0022110)
Supplement: Table S6 — Spearman correlation between methylation of different genes. In each cell, the top number is the correlation coefficient r. The bottom number is a P value. To correct for multiple comparisons, P<.001 was considered significant. (XLS) [file pone.0022110.s006.xls]

## Sheet: All
Spearman r
Parameter														P15	CDH13	RIL-1	NOR1	NPM2	PGRA	PGRB	DPYS	AP2E108	ABL75
Number of XY Pairs	130	130	129	130	130	130	130	130	130	129			P15	1	0.1378	0.2591	0.09627	0.2812	0.3281	0.2298	0.2995	0.1675	0.1954
Spearman r	1	0.1378	0.2591	0.09627	0.2812	0.3281	0.2298	0.2995	0.1675	0.1954				P<0.0001	0.1178	0.003	0.2759	0.0012	0.0001	0.0085	0.0005	0.0568	0.0264
95% confidence interval	1.000 to 1.000	-0.04035 to 0.3076	0.08512 to 0.4177	-0.08235 to 0.2689	0.1095 to 0.4367	0.1602 to 0.4775	0.05485 to 0.3911	0.1292 to 0.4527	-0.009981 to 0.3348	0.01817 to 0.3608			CDH13	0.1378	1	0.2044	0.2076	0.2177	0.5139	0.2779	0.3141	0.2313	0.0092
P value (two-tailed)	P<0.0001	0.1178	0.003	0.2759	0.0012	0.0001	0.0085	0.0005	0.0568	0.0264				0.1178	P<0.0001	0.0202	0.0178	0.0129	P<0.0001	0.0014	0.0003	0.0081	0.9176
P value summary	***	ns	**	ns	**	***	**	***	ns	*			RIL-1	0.2591	0.2044	1	0.2623	0.2353	0.1688	0.2701	0.2336	0.2828	0.07638
Exact or approximate P value?	Gaussian Approximation	Gaussian Approximation	Gaussian Approximation	Gaussian Approximation	Gaussian Approximation	Gaussian Approximation	Gaussian Approximation	Gaussian Approximation	Gaussian Approximation	Gaussian Approximation				0.003	0.0202	P<0.0001	0.0027	0.0073	0.0559	0.002	0.0077	0.0012	0.3915
Is the correlation significant? (alpha=0.05)	Yes	No	Yes	No	Yes	Yes	Yes	Yes	No	Yes			NOR1	0.09627	0.2076	0.2623	1	0.3019	0.2231	0.3547	0.2326	0.1952	0.1462
														0.2759	0.0178	0.0027	P<0.0001	0.0005	0.0107	P<0.0001	0.0078	0.026	0.0984
													NPM2	0.2812	0.2177	0.2353	0.3019	1	0.06703	0.1252	0.37	0.2281	0.3622
Parameter	P15	CDH13	RIL-1	NOR1	NPM2	PGRA	PGRB	DPYS	AP2E108	ABL75				0.0012	0.0129	0.0073	0.0005	P<0.0001	0.4486	0.1559	P<0.0001	0.0091	P<0.0001
Number of XY Pairs	130	130	129	130	130	130	130	130	130	129			PGRA	0.3281	0.5139	0.1688	0.2231	0.06703	1	0.401	0.3868	0.1715	0.112
Spearman r	0.1378	1	0.2044	0.2076	0.2177	0.5139	0.2779	0.3141	0.2313	0.0092				0.0001	P<0.0001	0.0559	0.0107	0.4486	P<0.0001	P<0.0001	P<0.0001	0.051	0.2063
95% confidence interval	-0.04035 to 0.3076	1.000 to 1.000	0.02749 to 0.3689	0.03158 to 0.3712	0.04207 to 0.3802	0.3704 to 0.6334	0.1059 to 0.4337	0.1449 to 0.4654	0.05635 to 0.3924	-0.1690 to 0.1868			PGRB	0.2298	0.2779	0.2701	0.3547	0.1252	0.401	1	0.2926	0.1276	0.1134
P value (two-tailed)	0.1178	P<0.0001	0.0202	0.0178	0.0129	P<0.0001	0.0014	0.0003	0.0081	0.9176				0.0085	0.0014	0.002	P<0.0001	0.1559	P<0.0001	P<0.0001	0.0007	0.1478	0.2006
P value summary	ns	***	*	*	*	***	**	***	**	ns			DPYS	0.2995	0.3141	0.2336	0.2326	0.37	0.3868	0.2926	1	0.2891	0.1617
Exact or approximate P value?	Gaussian Approximation	Gaussian Approximation	Gaussian Approximation	Gaussian Approximation	Gaussian Approximation	Gaussian Approximation	Gaussian Approximation	Gaussian Approximation	Gaussian Approximation	Gaussian Approximation				0.0005	0.0003	0.0077	0.0078	P<0.0001	P<0.0001	0.0007	P<0.0001	0.0008	0.0671
Is the correlation significant? (alpha=0.05)	No	Yes	Yes	Yes	Yes	Yes	Yes	Yes	Yes	No			AP2E108	0.1675	0.2313	0.2828	0.1952	0.2281	0.1715	0.1276	0.2891	1	0.04987
														0.0568	0.0081	0.0012	0.026	0.0091	0.051	0.1478	0.0008	P<0.0001	0.5746
													ABL75	0.1954	0.0092	0.07638	0.1462	0.3622	0.112	0.1134	0.1617	0.04987	1
Parameter	P15	CDH13	RIL-1	NOR1	NPM2	PGRA	PGRB	DPYS	AP2E108	ABL75				0.0264	0.9176	0.3915	0.0984	P<0.0001	0.2063	0.2006	0.0671	0.5746	P<0.0001
Number of XY Pairs	129	129	129	129	129	129	129	129	129	128
Spearman r	0.2591	0.2044	1	0.2623	0.2353	0.1688	0.2701	0.2336	0.2828	0.07638
95% confidence interval	0.08512 to 0.4177	0.02749 to 0.3689	1.000 to 1.000	0.08848 to 0.4205	0.05990 to 0.3966	-0.009416 to 0.3366	0.09688 to 0.4275	0.05809 to 0.3951	0.1105 to 0.4387	-0.1036 to 0.2515
P value (two-tailed)	0.003	0.0202	P<0.0001	0.0027	0.0073	0.0559	0.002	0.0077	0.0012	0.3915
P value summary	**	*	***	**	**	ns	**	**	**	ns
Exact or approximate P value?	Gaussian Approximation	Gaussian Approximation	Gaussian Approximation	Gaussian Approximation	Gaussian Approximation	Gaussian Approximation	Gaussian Approximation	Gaussian Approximation	Gaussian Approximation	Gaussian Approximation
Is the correlation significant? (alpha=0.05)	Yes	Yes	Yes	Yes	Yes	No	Yes	Yes	Yes	No
Parameter	P15	CDH13	RIL-1	NOR1	NPM2	PGRA	PGRB	DPYS	AP2E108	ABL75
Number of XY Pairs	130	130	129	130	130	130	130	130	130	129
Spearman r	0.09627	0.2076	0.2623	1	0.3019	0.2231	0.3547	0.2326	0.1952	0.1462
95% confidence interval	-0.08235 to 0.2689	0.03158 to 0.3712	0.08848 to 0.4205	1.000 to 1.000	0.1317 to 0.4548	0.04776 to 0.3851	0.1894 to 0.5005	0.05773 to 0.3936	0.01864 to 0.3600	-0.03259 to 0.3158
P value (two-tailed)	0.2759	0.0178	0.0027	P<0.0001	0.0005	0.0107	P<0.0001	0.0078	0.026	0.0984
P value summary	ns	*	**	***	***	*	***	**	*	ns
Exact or approximate P value?	Gaussian Approximation	Gaussian Approximation	Gaussian Approximation	Gaussian Approximation	Gaussian Approximation	Gaussian Approximation	Gaussian Approximation	Gaussian Approximation	Gaussian Approximation	Gaussian Approximation
Is the correlation significant? (alpha=0.05)	No	Yes	Yes	Yes	Yes	Yes	Yes	Yes	Yes	No
Parameter	P15	CDH13	RIL-1	NOR1	NPM2	PGRA	PGRB	DPYS	AP2E108	ABL75
Number of XY Pairs	130	130	129	130	130	130	130	130	130	129
Spearman r	0.2812	0.2177	0.2353	0.3019	1	0.06703	0.1252	0.37	0.2281	0.3622
95% confidence interval	0.1095 to 0.4367	0.04207 to 0.3802	0.05990 to 0.3966	0.1317 to 0.4548	1.000 to 1.000	-0.1115 to 0.2414	-0.05322 to 0.2958	0.2064 to 0.5136	0.05299 to 0.3895	0.1970 to 0.5074
P value (two-tailed)	0.0012	0.0129	0.0073	0.0005	P<0.0001	0.4486	0.1559	P<0.0001	0.0091	P<0.0001
P value summary	**	*	**	***	***	ns	ns	***	**	***
Exact or approximate P value?	Gaussian Approximation	Gaussian Approximation	Gaussian Approximation	Gaussian Approximation	Gaussian Approximation	Gaussian Approximation	Gaussian Approximation	Gaussian Approximation	Gaussian Approximation	Gaussian Approximation
Is the correlation significant? (alpha=0.05)	Yes	Yes	Yes	Yes	Yes	No	No	Yes	Yes	Yes
Parameter	P15	CDH13	RIL-1	NOR1	NPM2	PGRA	PGRB	DPYS	AP2E108	ABL75
Number of XY Pairs	130	130	129	130	130	130	130	130	130	129
Spearman r	0.3281	0.5139	0.1688	0.2231	0.06703	1	0.401	0.3868	0.1715	0.112
95% confidence interval	0.1602 to 0.4775	0.3704 to 0.6334	-0.009416 to 0.3366	0.04776 to 0.3851	-0.1115 to 0.2414	1.000 to 1.000	0.2409 to 0.5398	0.2250 to 0.5278	-0.005886 to 0.3384	-0.06723 to 0.2842
P value (two-tailed)	0.0001	P<0.0001	0.0559	0.0107	0.4486	P<0.0001	P<0.0001	P<0.0001	0.051	0.2063
P value summary	***	***	ns	*	ns	***	***	***	ns	ns
Exact or approximate P value?	Gaussian Approximation	Gaussian Approximation	Gaussian Approximation	Gaussian Approximation	Gaussian Approximation	Gaussian Approximation	Gaussian Approximation	Gaussian Approximation	Gaussian Approximation	Gaussian Approximation
Is the correlation significant? (alpha=0.05)	Yes	Yes	No	Yes	No	Yes	Yes	Yes	No	No
Parameter	P15	CDH13	RIL-1	NOR1	NPM2	PGRA	PGRB	DPYS	AP2E108	ABL75
Number of XY Pairs	130	130	129	130	130	130	130	130	130	129
Spearman r	0.2298	0.2779	0.2701	0.3547	0.1252	0.401	1	0.2926	0.1276	0.1134
95% confidence interval	0.05485 to 0.3911	0.1059 to 0.4337	0.09688 to 0.4275	0.1894 to 0.5005	-0.05322 to 0.2958	0.2409 to 0.5398	1.000 to 1.000	0.1217 to 0.4467	-0.05071 to 0.2981	-0.06579 to 0.2856
P value (two-tailed)	0.0085	0.0014	0.002	P<0.0001	0.1559	P<0.0001	P<0.0001	0.0007	0.1478	0.2006
P value summary	**	**	**	***	ns	***	***	***	ns	ns
Exact or approximate P value?	Gaussian Approximation	Gaussian Approximation	Gaussian Approximation	Gaussian Approximation	Gaussian Approximation	Gaussian Approximation	Gaussian Approximation	Gaussian Approximation	Gaussian Approximation	Gaussian Approximation
Is the correlation significant? (alpha=0.05)	Yes	Yes	Yes	Yes	No	Yes	Yes	Yes	No	No
Parameter	P15	CDH13	RIL-1	NOR1	NPM2	PGRA	PGRB	DPYS	AP2E108	ABL75
Number of XY Pairs	130	130	129	130	130	130	130	130	130	129
Spearman r	0.2995	0.3141	0.2336	0.2326	0.37	0.3868	0.2926	1	0.2891	0.1617
95% confidence interval	0.1292 to 0.4527	0.1449 to 0.4654	0.05809 to 0.3951	0.05773 to 0.3936	0.2064 to 0.5136	0.2250 to 0.5278	0.1217 to 0.4467	1.000 to 1.000	0.1180 to 0.4436	-0.01664 to 0.3301
P value (two-tailed)	0.0005	0.0003	0.0077	0.0078	P<0.0001	P<0.0001	0.0007	P<0.0001	0.0008	0.0671
P value summary	***	***	**	**	***	***	***	***	***	ns
Exact or approximate P value?	Gaussian Approximation	Gaussian Approximation	Gaussian Approximation	Gaussian Approximation	Gaussian Approximation	Gaussian Approximation	Gaussian Approximation	Gaussian Approximation	Gaussian Approximation	Gaussian Approximation
Is the correlation significant? (alpha=0.05)	Yes	Yes	Yes	Yes	Yes	Yes	Yes	Yes	Yes	No
Parameter	P15	CDH13	RIL-1	NOR1	NPM2	PGRA	PGRB	DPYS	AP2E108	ABL75
Number of XY Pairs	130	130	129	130	130	130	130	130	130	129
Spearman r	0.1675	0.2313	0.2828	0.1952	0.2281	0.1715	0.1276	0.2891	1	0.04987
95% confidence interval	-0.009981 to 0.3348	0.05635 to 0.3924	0.1105 to 0.4387	0.01864 to 0.3600	0.05299 to 0.3895	-0.005886 to 0.3384	-0.05071 to 0.2981	0.1180 to 0.4436	1.000 to 1.000	-0.1292 to 0.2258
P value (two-tailed)	0.0568	0.0081	0.0012	0.026	0.0091	0.051	0.1478	0.0008	P<0.0001	0.5746
P value summary	ns	**	**	*	**	ns	ns	***	***	ns
Exact or approximate P value?	Gaussian Approximation	Gaussian Approximation	Gaussian Approximation	Gaussian Approximation	Gaussian Approximation	Gaussian Approximation	Gaussian Approximation	Gaussian Approximation	Gaussian Approximation	Gaussian Approximation
Is the correlation significant? (alpha=0.05)	No	Yes	Yes	Yes	Yes	No	No	Yes	Yes	No
Parameter	P15	CDH13	RIL-1	NOR1	NPM2	PGRA	PGRB	DPYS	AP2E108	ABL75
Number of XY Pairs	129	129	128	129	129	129	129	129	129	129
Spearman r	0.1954	0.0092	0.07638	0.1462	0.3622	0.112	0.1134	0.1617	0.04987	1
95% confidence interval	0.01817 to 0.3608	-0.1690 to 0.1868	-0.1036 to 0.2515	-0.03259 to 0.3158	0.1970 to 0.5074	-0.06723 to 0.2842	-0.06579 to 0.2856	-0.01664 to 0.3301	-0.1292 to 0.2258	1.000 to 1.000
P value (two-tailed)	0.0264	0.9176	0.3915	0.0984	P<0.0001	0.2063	0.2006	0.0671	0.5746	P<0.0001
P value summary	*	ns	ns	ns	***	ns	ns	ns	ns	***
Exact or approximate P value?	Gaussian Approximation	Gaussian Approximation	Gaussian Approximation	Gaussian Approximation	Gaussian Approximation	Gaussian Approximation	Gaussian Approximation	Gaussian Approximation	Gaussian Approximation	Gaussian Approximation
Is the correlation significant? (alpha=0.05)	Yes	No	No	No	Yes	No	No	No	No	Yes

## Sheet: AP
	P15	CDH13	RIL-1	NOR1	NPM2	PGRA	PGRB	DPYS	AP2E108	ABL75				P15	CDH13	RIL-1	NOR1	NPM2	PGRA	PGRB	DPYS	AP2E108	ABL75
Number of XY Pairs	39	39	39	39	39	39	39	39	39	39
Spearman r	1	-0.008776	0.2326	-0.03297	0.2586	0.3021	0.3776	0.3427	0.07165	0.03631			P15	1	-0.008776	0.2326	-0.03297	0.2586	0.3021	0.3776	0.3427	0.07165	0.03631
95% confidence interval	1.000 to 1.000	-0.3321 to 0.3164	-0.09910 to 0.5178	-0.3535 to 0.2944	-0.07162 to 0.5378	-0.02457 to 0.5705	0.06076 to 0.6253	0.02070 to 0.6002	-0.2586 to 0.3869	-0.2914 to 0.3564				P<0.0001	0.9577	0.1541	0.8421	0.1119	0.0616	0.0178	0.0327	0.6647	0.8263
P value (two-tailed)	P<0.0001	0.9577	0.1541	0.8421	0.1119	0.0616	0.0178	0.0327	0.6647	0.8263			CDH13	-0.008776	1	0.08866	-0.09784	-0.06665	0.4163	0.01667	0.2113	0.216	-0.2057
P value summary	***	ns	ns	ns	ns	ns	*	*	ns	ns				0.9577	P<0.0001	0.5915	0.5535	0.6868	0.0084	0.9198	0.1966	0.1867	0.2091
Exact or approximate P value?	Gaussian Approximation	Gaussian Approximation	Gaussian Approximation	Gaussian Approximation	Gaussian Approximation	Gaussian Approximation	Gaussian Approximation	Gaussian Approximation	Gaussian Approximation	Gaussian Approximation			RIL-1	0.2326	0.08866	1	0.4071	0.1918	0.001881	0.3437	0.1975	0.1794	0.097
Is the correlation significant? (alpha=0.05)	Yes	No	No	No	No	No	Yes	Yes	No	No				0.1541	0.5915	P<0.0001	0.0101	0.242	0.9909	0.0321	0.2281	0.2745	0.5569
													NOR1	-0.03297	-0.09784	0.4071	1	0.09623	0.01927	0.2704	0.3191	0.3797	0.07021
Number of XY Pairs	39	39	39	39	39	39	39	39	39	39				0.8421	0.5535	0.0101	P<0.0001	0.5601	0.9073	0.0959	0.0477	0.0171	0.6711
Spearman r	-0.008776	1	0.08866	-0.09784	-0.06665	0.4163	0.01667	0.2113	0.216	-0.2057			NPM2	0.2586	-0.06665	0.1918	0.09623	1	-0.174	-0.06294	0.3238	0.1523	0.3215
95% confidence interval	-0.3321 to 0.3164	1.000 to 1.000	-0.2426 to 0.4014	-0.4091 to 0.2338	-0.3826 to 0.2633	0.1064 to 0.6525	-0.3093 to 0.3391	-0.1213 to 0.5012	-0.1165 to 0.5049	-0.4968 to 0.1271				0.1119	0.6868	0.242	0.5601	P<0.0001	0.2895	0.7035	0.0443	0.3545	0.046
P value (two-tailed)	0.9577	P<0.0001	0.5915	0.5535	0.6868	0.0084	0.9198	0.1966	0.1867	0.2091			PGRA	0.3021	0.4163	0.001881	0.01927	-0.174	1	0.5915	0.3328	0.08687	0.05022
P value summary	ns	***	ns	ns	ns	**	ns	ns	ns	ns				0.0616	0.0084	0.9909	0.9073	0.2895	P<0.0001	P<0.0001	0.0385	0.599	0.7614
Exact or approximate P value?	Gaussian Approximation	Gaussian Approximation	Gaussian Approximation	Gaussian Approximation	Gaussian Approximation	Gaussian Approximation	Gaussian Approximation	Gaussian Approximation	Gaussian Approximation	Gaussian Approximation			PGRB	0.3776	0.01667	0.3437	0.2704	-0.06294	0.5915	1	0.2833	-0.004769	0.1802
Is the correlation significant? (alpha=0.05)	No	Yes	No	No	No	Yes	No	No	No	No				0.0178	0.9198	0.0321	0.0959	0.7035	P<0.0001	P<0.0001	0.0805	0.977	0.2724
													DPYS	0.3427	0.2113	0.1975	0.3191	0.3238	0.3328	0.2833	1	0.3279	0.03345
Number of XY Pairs	39	39	39	39	39	39	39	39	39	39				0.0327	0.1966	0.2281	0.0477	0.0443	0.0385	0.0805	P<0.0001	0.0416	0.8398
Spearman r	0.2326	0.08866	1	0.4071	0.1918	0.001881	0.3437	0.1975	0.1794	0.097			AP2E108	0.07165	0.216	0.1794	0.3797	0.1523	0.08687	-0.004769	0.3279	1	0.03577
95% confidence interval	-0.09910 to 0.5178	-0.2426 to 0.4014	1.000 to 1.000	0.09546 to 0.6461	-0.1412 to 0.4859	-0.3226 to 0.3259	0.02193 to 0.6010	-0.1354 to 0.4904	-0.1538 to 0.4760	-0.2346 to 0.4084				0.6647	0.1867	0.2745	0.0171	0.3545	0.599	0.977	0.0416	P<0.0001	0.8288
P value (two-tailed)	0.1541	0.5915	P<0.0001	0.0101	0.242	0.9909	0.0321	0.2281	0.2745	0.5569			ABL75	0.03631	-0.2057	0.097	0.07021	0.3215	0.05022	0.1802	0.03345	0.03577	1
P value summary	ns	ns	***	*	ns	ns	*	ns	ns	ns				0.8263	0.2091	0.5569	0.6711	0.046	0.7614	0.2724	0.8398	0.8288	P<0.0001
Exact or approximate P value?	Gaussian Approximation	Gaussian Approximation	Gaussian Approximation	Gaussian Approximation	Gaussian Approximation	Gaussian Approximation	Gaussian Approximation	Gaussian Approximation	Gaussian Approximation	Gaussian Approximation
Is the correlation significant? (alpha=0.05)	No	No	Yes	Yes	No	No	Yes	No	No	No
Number of XY Pairs	39	39	39	39	39	39	39	39	39	39
Spearman r	-0.03297	-0.09784	0.4071	1	0.09623	0.01927	0.2704	0.3191	0.3797	0.07021
95% confidence interval	-0.3535 to 0.2944	-0.4091 to 0.2338	0.09546 to 0.6461	1.000 to 1.000	-0.2354 to 0.4078	-0.3069 to 0.3414	-0.05899 to 0.5468	-0.005769 to 0.5830	0.06323 to 0.6268	-0.2600 to 0.3857
P value (two-tailed)	0.8421	0.5535	0.0101	P<0.0001	0.5601	0.9073	0.0959	0.0477	0.0171	0.6711
P value summary	ns	ns	*	***	ns	ns	ns	*	*	ns
Exact or approximate P value?	Gaussian Approximation	Gaussian Approximation	Gaussian Approximation	Gaussian Approximation	Gaussian Approximation	Gaussian Approximation	Gaussian Approximation	Gaussian Approximation	Gaussian Approximation	Gaussian Approximation
Is the correlation significant? (alpha=0.05)	No	No	Yes	Yes	No	No	No	Yes	Yes	No
Number of XY Pairs	39	39	39	39	39	39	39	39	39	39
Spearman r	0.2586	-0.06665	0.1918	0.09623	1	-0.174	-0.06294	0.3238	0.1523	0.3215
95% confidence interval	-0.07162 to 0.5378	-0.3826 to 0.2633	-0.1412 to 0.4859	-0.2354 to 0.4078	1.000 to 1.000	-0.4716 to 0.1593	-0.3795 to 0.2668	-0.0005321 to 0.5865	-0.1809 to 0.4542	-0.003111 to 0.5848
P value (two-tailed)	0.1119	0.6868	0.242	0.5601	P<0.0001	0.2895	0.7035	0.0443	0.3545	0.046
P value summary	ns	ns	ns	ns	***	ns	ns	*	ns	*
Exact or approximate P value?	Gaussian Approximation	Gaussian Approximation	Gaussian Approximation	Gaussian Approximation	Gaussian Approximation	Gaussian Approximation	Gaussian Approximation	Gaussian Approximation	Gaussian Approximation	Gaussian Approximation
Is the correlation significant? (alpha=0.05)	No	No	No	No	Yes	No	No	Yes	No	Yes
Number of XY Pairs	39	39	39	39	39	39	39	39	39	39
Spearman r	0.3021	0.4163	0.001881	0.01927	-0.174	1	0.5915	0.3328	0.08687	0.05022
95% confidence interval	-0.02457 to 0.5705	0.1064 to 0.6525	-0.3226 to 0.3259	-0.3069 to 0.3414	-0.4716 to 0.1593	1.000 to 1.000	0.3306 to 0.7684	0.009544 to 0.5930	-0.2443 to 0.3999	-0.2786 to 0.3685
P value (two-tailed)	0.0616	0.0084	0.9909	0.9073	0.2895	P<0.0001	P<0.0001	0.0385	0.599	0.7614
P value summary	ns	**	ns	ns	ns	***	***	*	ns	ns
Exact or approximate P value?	Gaussian Approximation	Gaussian Approximation	Gaussian Approximation	Gaussian Approximation	Gaussian Approximation	Gaussian Approximation	Gaussian Approximation	Gaussian Approximation	Gaussian Approximation	Gaussian Approximation
Is the correlation significant? (alpha=0.05)	No	Yes	No	No	No	Yes	Yes	Yes	No	No
Number of XY Pairs	39	39	39	39	39	39	39	39	39	39
Spearman r	0.3776	0.01667	0.3437	0.2704	-0.06294	0.5915	1	0.2833	-0.004769	0.1802
95% confidence interval	0.06076 to 0.6253	-0.3093 to 0.3391	0.02193 to 0.6010	-0.05899 to 0.5468	-0.3795 to 0.2668	0.3306 to 0.7684	1.000 to 1.000	-0.04505 to 0.5565	-0.3285 to 0.3200	-0.1530 to 0.4766
P value (two-tailed)	0.0178	0.9198	0.0321	0.0959	0.7035	P<0.0001	P<0.0001	0.0805	0.977	0.2724
P value summary	*	ns	*	ns	ns	***	***	ns	ns	ns
Exact or approximate P value?	Gaussian Approximation	Gaussian Approximation	Gaussian Approximation	Gaussian Approximation	Gaussian Approximation	Gaussian Approximation	Gaussian Approximation	Gaussian Approximation	Gaussian Approximation	Gaussian Approximation
Is the correlation significant? (alpha=0.05)	Yes	No	Yes	No	No	Yes	Yes	No	No	No
Number of XY Pairs	39	39	39	39	39	39	39	39	39	39
Spearman r	0.3427	0.2113	0.1975	0.3191	0.3238	0.3328	0.2833	1	0.3279	0.03345
95% confidence interval	0.02070 to 0.6002	-0.1213 to 0.5012	-0.1354 to 0.4904	-0.005769 to 0.5830	-0.0005321 to 0.5865	0.009544 to 0.5930	-0.04505 to 0.5565	1.000 to 1.000	0.004027 to 0.5895	-0.2940 to 0.3539
P value (two-tailed)	0.0327	0.1966	0.2281	0.0477	0.0443	0.0385	0.0805	P<0.0001	0.0416	0.8398
P value summary	*	ns	ns	*	*	*	ns	***	*	ns
Exact or approximate P value?	Gaussian Approximation	Gaussian Approximation	Gaussian Approximation	Gaussian Approximation	Gaussian Approximation	Gaussian Approximation	Gaussian Approximation	Gaussian Approximation	Gaussian Approximation	Gaussian Approximation
Is the correlation significant? (alpha=0.05)	Yes	No	No	Yes	Yes	Yes	No	Yes	Yes	No
Number of XY Pairs	39	39	39	39	39	39	39	39	39	39
Spearman r	0.07165	0.216	0.1794	0.3797	0.1523	0.08687	-0.004769	0.3279	1	0.03577
95% confidence interval	-0.2586 to 0.3869	-0.1165 to 0.5049	-0.1538 to 0.4760	0.06323 to 0.6268	-0.1809 to 0.4542	-0.2443 to 0.3999	-0.3285 to 0.3200	0.004027 to 0.5895	1.000 to 1.000	-0.2919 to 0.3559
P value (two-tailed)	0.6647	0.1867	0.2745	0.0171	0.3545	0.599	0.977	0.0416	P<0.0001	0.8288
P value summary	ns	ns	ns	*	ns	ns	ns	*	***	ns
Exact or approximate P value?	Gaussian Approximation	Gaussian Approximation	Gaussian Approximation	Gaussian Approximation	Gaussian Approximation	Gaussian Approximation	Gaussian Approximation	Gaussian Approximation	Gaussian Approximation	Gaussian Approximation
Is the correlation significant? (alpha=0.05)	No	No	No	Yes	No	No	No	Yes	Yes	No
Number of XY Pairs	39	39	39	39	39	39	39	39	39	39
Spearman r	0.03631	-0.2057	0.097	0.07021	0.3215	0.05022	0.1802	0.03345	0.03577	1
95% confidence interval	-0.2914 to 0.3564	-0.4968 to 0.1271	-0.2346 to 0.4084	-0.2600 to 0.3857	-0.003111 to 0.5848	-0.2786 to 0.3685	-0.1530 to 0.4766	-0.2940 to 0.3539	-0.2919 to 0.3559	1.000 to 1.000
P value (two-tailed)	0.8263	0.2091	0.5569	0.6711	0.046	0.7614	0.2724	0.8398	0.8288	P<0.0001
P value summary	ns	ns	ns	ns	*	ns	ns	ns	ns	***
Exact or approximate P value?	Gaussian Approximation	Gaussian Approximation	Gaussian Approximation	Gaussian Approximation	Gaussian Approximation	Gaussian Approximation	Gaussian Approximation	Gaussian Approximation	Gaussian Approximation	Gaussian Approximation
Is the correlation significant? (alpha=0.05)	No	No	No	No	Yes	No	No	No	No	Yes
Parameter	P15	CDH13	RIL-1	NOR1	NPM2	PGRA	PGRB	DPYS	AP2E108	ABL75	AGE
Number of XY Pairs	37	37	37	37	37	37	37	37	37	37	37
Spearman r	0.1677	0.1542	0.3063	0.1171	-0.3411	0.2854	0.3429	0.06164	-0.0445	-0.2345	1
95% confidence interval	-0.1751 to 0.4741	-0.1884 to 0.4634	-0.02968 to 0.5801	-0.2246 to 0.4332	-0.6053 to -0.009199	-0.05251 to 0.5647	0.01123 to 0.6066	-0.2770 to 0.3867	-0.3719 to 0.2928	-0.5264 to 0.1068	1.000 to 1.000
P value (two-tailed)	0.3213	0.362	0.0652	0.49	0.0388	0.0868	0.0377	0.7171	0.7937	0.1623	P<0.0001
P value summary	ns	ns	ns	ns	*	ns	*	ns	ns	ns	***
Exact or approximate P value?	Gaussian Approximation	Gaussian Approximation	Gaussian Approximation	Gaussian Approximation	Gaussian Approximation	Gaussian Approximation	Gaussian Approximation	Gaussian Approximation	Gaussian Approximation	Gaussian Approximation	Gaussian Approximation
Is the correlation significant? (alpha=0.05)	No	No	No	No	Yes	No	Yes	No	No	No	Yes

## Sheet: Correlation Tables
Spearman Correlation Tables
CP	P15	CDH13	RIL-1	NOR1	NPM2	PGRA	PGRB	DPYS	AP2E108	ABL75
												Avg R	Signif correl
P15	1	0.207	0.1458	0.2086	0.1679	0.3693	0.3322	0.1773	0.03718	0.2359		0.20902	2
	P<0.0001	0.0903	0.2392	0.0878	0.1711	0.0019	0.0057	0.1481	0.7634	0.0546
CDH13	0.207	1	0.08096	0.0526	0.07948	0.4781	0.2115	0.2042	0.06456	-0.01924		0.151018	1
	0.0903	P<0.0001	0.5149	0.6701	0.5194	P<0.0001	0.0833	0.0949	0.6009	0.8772
RIL-1	0.1458	0.08096	1	0.1111	0.1378	0.05895	0.1126	0.02581	0.2334	0.0103		0.101858	0
	0.2392	0.5149	P<0.0001	0.3709	0.2661	0.6356	0.3645	0.8357	0.0574	0.9346
NOR1	0.2086	0.0526	0.1111	1	0.3137	0.09823	0.2409	-0.08469	-0.03558	0.2558		0.128962	3
	0.0878	0.6701	0.3709	P<0.0001	0.0092	0.4255	0.0478	0.4923	0.7733	0.0366
NPM2	0.1679	0.07948	0.1378	0.3137	1	-0.05189	0.2874	0.259	0.1279	0.3439		0.185021	4
	0.1711	0.5194	0.2661	0.0092	P<0.0001	0.6743	0.0175	0.0329	0.2985	0.0044
PGRA	0.3693	0.4781	0.05895	0.09823	-0.05189	1	0.2386	0.2987	0.02739	0.04501		0.173599	3
	0.0019	P<0.0001	0.6356	0.4255	0.6743	P<0.0001	0.0501	0.0134	0.8245	0.7176
PGRB	0.3322	0.2115	0.1126	0.2409	0.2874	0.2386	1	0.2416	0.1371	0.01415		0.201783	4
	0.0057	0.0833	0.3645	0.0478	0.0175	0.0501	P<0.0001	0.0471	0.2651	0.9095
DPYS	0.1773	0.2042	0.02581	-0.08469	0.259	0.2987	0.2416	1	0.05069	0.04057		0.134798	3
	0.1481	0.0949	0.8357	0.4923	0.0329	0.0134	0.0471	P<0.0001	0.6814	0.7444
AP2E108	0.03718	0.06456	0.2334	-0.03558	0.1279	0.02739	0.1371	0.05069	1	-0.07074		0.0635444	0
	0.7634	0.6009	0.0574	0.7733	0.2985	0.8245	0.2651	0.6814	P<0.0001	0.5695
ABL75	0.2359	-0.01924	0.0103	0.2558	0.3439	0.04501	0.01415	0.04057	-0.07074	1		0.0950722	2
	0.0546	0.8772	0.9346	0.0366	0.0044	0.7176	0.9095	0.7444	0.5695	P<0.0001
AP	P15	CDH13	RIL-1	NOR1	NPM2	PGRA	PGRB	DPYS	AP2E108	ABL75
												Avg R	Signif correl
P15	1	-0.008776	0.2326	-0.03297	0.2586	0.3021	0.3776	0.3427	0.07165	0.03631		0.175535	2
	P<0.0001	0.9577	0.1541	0.8421	0.1119	0.0616	0.0178	0.0327	0.6647	0.8263
CDH13	-0.008776	1	0.08866	-0.09784	-0.06665	0.4163	0.01667	0.2113	0.216	-0.2057		0.0633293	1
	0.9577	P<0.0001	0.5915	0.5535	0.6868	0.0084	0.9198	0.1966	0.1867	0.2091
RIL-1	0.2326	0.08866	1	0.4071	0.1918	0.001881	0.3437	0.1975	0.1794	0.097		0.193293	2
	0.1541	0.5915	P<0.0001	0.0101	0.242	0.9909	0.0321	0.2281	0.2745	0.5569
NOR1	-0.03297	-0.09784	0.4071	1	0.09623	0.01927	0.2704	0.3191	0.3797	0.07021		0.159022	3
	0.8421	0.5535	0.0101	P<0.0001	0.5601	0.9073	0.0959	0.0477	0.0171	0.6711
NPM2	0.2586	-0.06665	0.1918	0.09623	1	-0.174	-0.06294	0.3238	0.1523	0.3215		0.115627	2
	0.1119	0.6868	0.242	0.5601	P<0.0001	0.2895	0.7035	0.0443	0.3545	0.046
PGRA	0.3021	0.4163	0.001881	0.01927	-0.174	1	0.5915	0.3328	0.08687	0.05022		0.180771	1
	0.0616	0.0084	0.9909	0.9073	0.2895	P<0.0001	P<0.0001	0.0385	0.599	0.7614
PGRB	0.3776	0.01667	0.3437	0.2704	-0.06294	0.5915	1	0.2833	-0.004769	0.1802		0.22174	1
	0.0178	0.9198	0.0321	0.0959	0.7035	P<0.0001	P<0.0001	0.0805	0.977	0.2724
DPYS	0.3427	0.2113	0.1975	0.3191	0.3238	0.3328	0.2833	1	0.3279	0.03345		0.263539	5
	0.0327	0.1966	0.2281	0.0477	0.0443	0.0385	0.0805	P<0.0001	0.0416	0.8398
AP2E108	0.07165	0.216	0.1794	0.3797	0.1523	0.08687	-0.004769	0.3279	1	0.03577		0.160536	2
	0.6647	0.1867	0.2745	0.0171	0.3545	0.599	0.977	0.0416	P<0.0001	0.8288
ABL75	0.03631	-0.2057	0.097	0.07021	0.3215	0.05022	0.1802	0.03345	0.03577	1		0.0687733	1
	0.8263	0.2091	0.5569	0.6711	0.046	0.7614	0.2724	0.8398	0.8288	P<0.0001
BC
	P15	CDH13	RIL-1	NOR1	NPM2	PGRA	PGRB	DPYS	AP2E108	ABL75		Avg R	Signif correl
P15	1	0.06515	0.5026	0.03454	0.5437	0.3091	-0.04438	0.5311	0.503	0.2668		0.30129	4
	P<0.0001	0.7677	0.0145	0.8757	0.0073	0.1512	0.8407	0.0091	0.0144	0.2184
CDH13	0.06515	1	0.2096	0.3674	0.5383	0.5196	-0.06111	0.1424	0.1621	0.122		0.229493	2
	0.7677	P<0.0001	0.337	0.0846	0.0081	0.011	0.7818	0.5169	0.46	0.5792
RIL-1	0.5026	0.2096	1	-0.07063	0.3698	0.3313	-0.004452	0.4108	0.3577	0.1393		0.249558	1
	0.0145	0.337	P<0.0001	0.7488	0.0824	0.1226	0.9839	0.0515	0.0937	0.5262
NOR1	0.03454	0.3674	-0.07063	1	0.2481	0.2646	-0.2106	0.3835	0.2975	-0.1115		0.133657	1
	0.8757	0.0846	0.7488	P<0.0001	0.2537	0.2224	0.3349	0.0709	0.168	0.6124
NPM2	0.5437	0.5383	0.3698	0.2481	1	0.3099	-0.4246	0.3059	0.333	0.3189		0.282556	2
	0.0073	0.0081	0.0824	0.2537	P<0.0001	0.1502	0.0435	0.1557	0.1205	0.1381
PGRA	0.3091	0.5196	0.3313	0.2646	0.3099	1	-0.1332	0.4341	0.3786	0.3202		0.3038	2
	0.1512	0.011	0.1226	0.2224	0.1502	P<0.0001	0.5446	0.0385	0.0749	0.1364
PGRB	-0.04438	-0.06111	-0.004452	-0.2106	-0.4246	-0.1332	1	-0.09721	-0.2142	0.1231		-0.118517	1
	0.8407	0.7818	0.9839	0.3349	0.0435	0.5446	P<0.0001	0.659	0.3265	0.5759
DPYS	0.5311	0.1424	0.4108	0.3835	0.3059	0.4341	-0.09721	1	0.4176	0.3939		0.324677	3
	0.0091	0.5169	0.0515	0.0709	0.1557	0.0385	0.659	P<0.0001	0.0474	0.0629
AP2E108	0.503	0.1621	0.3577	0.2975	0.333	0.3786	-0.2142	0.4176	1	0.1538		0.265456	2
	0.0144	0.46	0.0937	0.168	0.1205	0.0749	0.3265	0.0474	P<0.0001	0.4836
ABL75	0.2668	0.122	0.1393	-0.1115	0.3189	0.3202	0.1231	0.3939	0.1538	1		0.191833	0
	0.2184	0.5792	0.5262	0.6124	0.1381	0.1364	0.5759	0.0629	0.4836	P<0.0001
All Pts	P15	CDH13	RIL-1	NOR1	NPM2	PGRA	PGRB	DPYS	AP2E108	ABL75	gene	Avg R	Signif correl		gene	Avg R	Signif correl
P15	1	0.1378	0.2591	0.09627	0.2812	0.3281	0.2298	0.2995	0.1675	0.1954	P15	0.22163	6		DPYS	0.286667	8
	P<0.0001	0.1178	0.003	0.2759	0.0012	0.0001	0.0085	0.0005	0.0568	0.0264					RIL-1	0.22142	7
CDH13	0.1378	1	0.2044	0.2076	0.2177	0.5139	0.2779	0.3141	0.2313	0.0092	CDH13	0.234878	7		NOR1	0.22443	7
	0.1178	P<0.0001	0.0202	0.0178	0.0129	P<0.0001	0.0014	0.0003	0.0081	0.9176					CDH13	0.234878	7
RIL-1	0.2591	0.2044	1	0.2623	0.2353	0.1688	0.2701	0.2336	0.2828	0.07638	RIL-1	0.22142	7		NPM2	0.243181	7
	0.003	0.0202	P<0.0001	0.0027	0.0073	0.0559	0.002	0.0077	0.0012	0.3915					P15	0.22163	6
NOR1	0.09627	0.2076	0.2623	1	0.3019	0.2231	0.3547	0.2326	0.1952	0.1462	NOR1	0.22443	7		AP2E108	0.193663	5
	0.2759	0.0178	0.0027	P<0.0001	0.0005	0.0107	P<0.0001	0.0078	0.026	0.0984					PGRB	0.243589	5
NPM2	0.2812	0.2177	0.2353	0.3019	1	0.06703	0.1252	0.37	0.2281	0.3622	NPM2	0.243181	7		PGRA	0.263581	4
	0.0012	0.0129	0.0073	0.0005	P<0.0001	0.4486	0.1559	P<0.0001	0.0091	P<0.0001					ABL75	0.136261	2
PGRA	0.3281	0.5139	0.1688	0.2231	0.06703	1	0.401	0.3868	0.1715	0.112	PGRA	0.263581	4
	0.0001	P<0.0001	0.0559	0.0107	0.4486	P<0.0001	P<0.0001	P<0.0001	0.051	0.2063
PGRB	0.2298	0.2779	0.2701	0.3547	0.1252	0.401	1	0.2926	0.1276	0.1134	PGRB	0.243589	5
	0.0085	0.0014	0.002	P<0.0001	0.1559	P<0.0001	P<0.0001	0.0007	0.1478	0.2006
DPYS	0.2995	0.3141	0.2336	0.2326	0.37	0.3868	0.2926	1	0.2891	0.1617	DPYS	0.286667	8
	0.0005	0.0003	0.0077	0.0078	P<0.0001	P<0.0001	0.0007	P<0.0001	0.0008	0.0671
AP2E108	0.1675	0.2313	0.2828	0.1952	0.2281	0.1715	0.1276	0.2891	1	0.04987	AP2E108	0.193663	5
	0.0568	0.0081	0.0012	0.026	0.0091	0.051	0.1478	0.0008	P<0.0001	0.5746
ABL75	0.1954	0.0092	0.07638	0.1462	0.3622	0.112	0.1134	0.1617	0.04987	1	ABL75	0.136261	2
	0.0264	0.9176	0.3915	0.0984	P<0.0001	0.2063	0.2006	0.0671	0.5746	P<0.0001

## Sheet: CP
Parameter	P15	CDH13	RIL-1	NOR1	NPM2	PGRA	PGRB	DPYS	AP2E108	ABL75	AGE
Number of XY Pairs	68	68	67	68	68	68	68	68	68	67	68
Spearman r	1	0.207	0.1458	0.2086	0.1679	0.3693	0.3322	0.1773	0.03718	0.2359	0.03209
95% confidence interval	1.000 to 1.000	-0.04027 to 0.4304	-0.1051 to 0.3792	-0.03864 to 0.4317	-0.08067 to 0.3968	0.1364 to 0.5635	0.09462 to 0.5339	-0.07107 to 0.4049	-0.2100 to 0.2799	-0.01182 to 0.4564	-0.2148 to 0.2752
P value (two-tailed)	P<0.0001	0.0903	0.2392	0.0878	0.1711	0.0019	0.0057	0.1481	0.7634	0.0546	0.795
P value summary	***	ns	ns	ns	ns	**	**	ns	ns	ns	ns
Exact or approximate P value?	Gaussian Approximation	Gaussian Approximation	Gaussian Approximation	Gaussian Approximation	Gaussian Approximation	Gaussian Approximation	Gaussian Approximation	Gaussian Approximation	Gaussian Approximation	Gaussian Approximation	Gaussian Approximation				P15	CDH13	RIL-1	NOR1	NPM2	PGRA	PGRB	DPYS	AP2E108	ABL75
Is the correlation significant? (alpha=0.05)	Yes	No	No	No	No	Yes	Yes	No	No	No	No
														P15	1	0.207	0.1458	0.2086	0.1679	0.3693	0.3322	0.1773	0.03718	0.2359
Parameter	P15	CDH13	RIL-1	NOR1	NPM2	PGRA	PGRB	DPYS	AP2E108	ABL75	AGE				P<0.0001	0.0903	0.2392	0.0878	0.1711	0.0019	0.0057	0.1481	0.7634	0.0546
Number of XY Pairs	68	68	67	68	68	68	68	68	68	67	68			CDH13	0.207	1	0.08096	0.0526	0.07948	0.4781	0.2115	0.2042	0.06456	-0.01924
Spearman r	0.207	1	0.08096	0.0526	0.07948	0.4781	0.2115	0.2042	0.06456	-0.01924	0.1206				0.0903	P<0.0001	0.5149	0.6701	0.5194	P<0.0001	0.0833	0.0949	0.6009	0.8772
95% confidence interval	-0.04027 to 0.4304	1.000 to 1.000	-0.1695 to 0.3216	-0.1952 to 0.2941	-0.1691 to 0.3185	0.2638 to 0.6474	-0.03555 to 0.4343	-0.04323 to 0.4280	-0.1836 to 0.3050	-0.2651 to 0.2289	-0.1285 to 0.3553			RIL-1	0.1458	0.08096	1	0.1111	0.1378	0.05895	0.1126	0.02581	0.2334	0.0103
P value (two-tailed)	0.0903	P<0.0001	0.5149	0.6701	0.5194	P<0.0001	0.0833	0.0949	0.6009	0.8772	0.3274				0.2392	0.5149	P<0.0001	0.3709	0.2661	0.6356	0.3645	0.8357	0.0574	0.9346
P value summary	ns	***	ns	ns	ns	***	ns	ns	ns	ns	ns			NOR1	0.2086	0.0526	0.1111	1	0.3137	0.09823	0.2409	-0.08469	-0.03558	0.2558
Exact or approximate P value?	Gaussian Approximation	Gaussian Approximation	Gaussian Approximation	Gaussian Approximation	Gaussian Approximation	Gaussian Approximation	Gaussian Approximation	Gaussian Approximation	Gaussian Approximation	Gaussian Approximation	Gaussian Approximation				0.0878	0.6701	0.3709	P<0.0001	0.0092	0.4255	0.0478	0.4923	0.7733	0.0366
Is the correlation significant? (alpha=0.05)	No	Yes	No	No	No	Yes	No	No	No	No	No			NPM2	0.1679	0.07948	0.1378	0.3137	1	-0.05189	0.2874	0.259	0.1279	0.3439
															0.1711	0.5194	0.2661	0.0092	P<0.0001	0.6743	0.0175	0.0329	0.2985	0.0044
Parameter	P15	CDH13	RIL-1	NOR1	NPM2	PGRA	PGRB	DPYS	AP2E108	ABL75	AGE			PGRB	0.3322	0.2115	0.1126	0.2409	0.2874	0.2386	1	0.2416	0.1371	0.01415
Number of XY Pairs	67	67	67	67	67	67	67	67	67	66	67				0.0057	0.0833	0.3645	0.0478	0.0175	0.0501	P<0.0001	0.0471	0.2651	0.9095
Spearman r	0.1458	0.08096	1	0.1111	0.1378	0.05895	0.1126	0.02581	0.2334	0.0103	0.08496			DPYS	0.1773	0.2042	0.02581	-0.08469	0.259	0.2987	0.2416	1	0.05069	0.04057
95% confidence interval	-0.1051 to 0.3792	-0.1695 to 0.3216	1.000 to 1.000	-0.1398 to 0.3486	-0.1131 to 0.3722	-0.1909 to 0.3016	-0.1384 to 0.3499	-0.2227 to 0.2712	-0.01456 to 0.4542	-0.2393 to 0.2586	-0.1656 to 0.3252				0.1481	0.0949	0.8357	0.4923	0.0329	0.0134	0.0471	P<0.0001	0.6814	0.7444
P value (two-tailed)	0.2392	0.5149	P<0.0001	0.3709	0.2661	0.6356	0.3645	0.8357	0.0574	0.9346	0.4943			AP2E108	0.03718	0.06456	0.2334	-0.03558	0.1279	0.02739	0.1371	0.05069	1	-0.07074
P value summary	ns	ns	***	ns	ns	ns	ns	ns	ns	ns	ns				0.7634	0.6009	0.0574	0.7733	0.2985	0.8245	0.2651	0.6814	P<0.0001	0.5695
Exact or approximate P value?	Gaussian Approximation	Gaussian Approximation	Gaussian Approximation	Gaussian Approximation	Gaussian Approximation	Gaussian Approximation	Gaussian Approximation	Gaussian Approximation	Gaussian Approximation	Gaussian Approximation	Gaussian Approximation			ABL75	0.2359	-0.01924	0.0103	0.2558	0.3439	0.04501	0.01415	0.04057	-0.07074	1
Is the correlation significant? (alpha=0.05)	No	No	Yes	No	No	No	No	No	No	No	No				0.0546	0.8772	0.9346	0.0366	0.0044	0.7176	0.9095	0.7444	0.5695	P<0.0001
Parameter	P15	CDH13	RIL-1	NOR1	NPM2	PGRA	PGRB	DPYS	AP2E108	ABL75	AGE
Number of XY Pairs	68	68	67	68	68	68	68	68	68	67	68
Spearman r	0.2086	0.0526	0.1111	1	0.3137	0.09823	0.2409	-0.08469	-0.03558	0.2558	0.09346
95% confidence interval	-0.03864 to 0.4317	-0.1952 to 0.2941	-0.1398 to 0.3486	1.000 to 1.000	0.07416 to 0.5190	-0.1506 to 0.3354	-0.004587 to 0.4591	-0.3232 to 0.1640	-0.2784 to 0.2115	0.009355 to 0.4730	-0.1553 to 0.3311
P value (two-tailed)	0.0878	0.6701	0.3709	P<0.0001	0.0092	0.4255	0.0478	0.4923	0.7733	0.0366	0.4484
P value summary	ns	ns	ns	***	**	ns	*	ns	ns	*	ns
Exact or approximate P value?	Gaussian Approximation	Gaussian Approximation	Gaussian Approximation	Gaussian Approximation	Gaussian Approximation	Gaussian Approximation	Gaussian Approximation	Gaussian Approximation	Gaussian Approximation	Gaussian Approximation	Gaussian Approximation
Is the correlation significant? (alpha=0.05)	No	No	No	Yes	Yes	No	Yes	No	No	Yes	No
Parameter	P15	CDH13	RIL-1	NOR1	NPM2	PGRA	PGRB	DPYS	AP2E108	ABL75	AGE
Number of XY Pairs	68	68	67	68	68	68	68	68	68	67	68
Spearman r	0.1679	0.07948	0.1378	0.3137	1	-0.05189	0.2874	0.259	0.1279	0.3439	-0.1326
95% confidence interval	-0.08067 to 0.3968	-0.1691 to 0.3185	-0.1131 to 0.3722	0.07416 to 0.5190	1.000 to 1.000	-0.2934 to 0.1959	0.04539 to 0.4976	0.01472 to 0.4742	-0.1211 to 0.3618	0.1059 to 0.5447	-0.3660 to 0.1164
P value (two-tailed)	0.1711	0.5194	0.2661	0.0092	P<0.0001	0.6743	0.0175	0.0329	0.2985	0.0044	0.2809
P value summary	ns	ns	ns	**	***	ns	*	*	ns	**	ns
Exact or approximate P value?	Gaussian Approximation	Gaussian Approximation	Gaussian Approximation	Gaussian Approximation	Gaussian Approximation	Gaussian Approximation	Gaussian Approximation	Gaussian Approximation	Gaussian Approximation	Gaussian Approximation	Gaussian Approximation
Is the correlation significant? (alpha=0.05)	No	No	No	Yes	Yes	No	Yes	Yes	No	Yes	No
Parameter	P15	CDH13	RIL-1	NOR1	NPM2	PGRA	PGRB	DPYS	AP2E108	ABL75	AGE
Number of XY Pairs	68	68	67	68	68	68	68	68	68	67	68
Spearman r	0.3693	0.4781	0.05895	0.09823	-0.05189	1	0.2386	0.2987	0.02739	0.04501	0.2127
95% confidence interval	0.1364 to 0.5635	0.2638 to 0.6474	-0.1909 to 0.3016	-0.1506 to 0.3354	-0.2934 to 0.1959	1.000 to 1.000	-0.007090 to 0.4571	0.05766 to 0.5068	-0.2193 to 0.2708	-0.2043 to 0.2889	-0.03438 to 0.4352
P value (two-tailed)	0.0019	P<0.0001	0.6356	0.4255	0.6743	P<0.0001	0.0501	0.0134	0.8245	0.7176	0.0817
P value summary	**	***	ns	ns	ns	***	ns	*	ns	ns	ns
Exact or approximate P value?	Gaussian Approximation	Gaussian Approximation	Gaussian Approximation	Gaussian Approximation	Gaussian Approximation	Gaussian Approximation	Gaussian Approximation	Gaussian Approximation	Gaussian Approximation	Gaussian Approximation	Gaussian Approximation
Is the correlation significant? (alpha=0.05)	Yes	Yes	No	No	No	Yes	No	Yes	No	No	No
Parameter	P15	CDH13	RIL-1	NOR1	NPM2	PGRA	PGRB	DPYS	AP2E108	ABL75	AGE
Number of XY Pairs	68	68	67	68	68	68	68	68	68	67	68
Spearman r	0.3322	0.2115	0.1126	0.2409	0.2874	0.2386	1	0.2416	0.1371	0.01415	-0.0326
95% confidence interval	0.09462 to 0.5339	-0.03555 to 0.4343	-0.1384 to 0.3499	-0.004587 to 0.4591	0.04539 to 0.4976	-0.007090 to 0.4571	1.000 to 1.000	-0.003839 to 0.4596	-0.1120 to 0.3699	-0.2338 to 0.2603	-0.2756 to 0.2144
P value (two-tailed)	0.0057	0.0833	0.3645	0.0478	0.0175	0.0501	P<0.0001	0.0471	0.2651	0.9095	0.7918
P value summary	**	ns	ns	*	*	ns	***	*	ns	ns	ns
Exact or approximate P value?	Gaussian Approximation	Gaussian Approximation	Gaussian Approximation	Gaussian Approximation	Gaussian Approximation	Gaussian Approximation	Gaussian Approximation	Gaussian Approximation	Gaussian Approximation	Gaussian Approximation	Gaussian Approximation
Is the correlation significant? (alpha=0.05)	Yes	No	No	Yes	Yes	No	Yes	Yes	No	No	No
Parameter	P15	CDH13	RIL-1	NOR1	NPM2	PGRA	PGRB	DPYS	AP2E108	ABL75	AGE
Number of XY Pairs	68	68	67	68	68	68	68	68	68	67	68
Spearman r	0.1773	0.2042	0.02581	-0.08469	0.259	0.2987	0.2416	1	0.05069	0.04057	0.1684
95% confidence interval	-0.07107 to 0.4049	-0.04323 to 0.4280	-0.2227 to 0.2712	-0.3232 to 0.1640	0.01472 to 0.4742	0.05766 to 0.5068	-0.003839 to 0.4596	1.000 to 1.000	-0.1970 to 0.2923	-0.2086 to 0.2848	-0.08012 to 0.3973
P value (two-tailed)	0.1481	0.0949	0.8357	0.4923	0.0329	0.0134	0.0471	P<0.0001	0.6814	0.7444	0.1697
P value summary	ns	ns	ns	ns	*	*	*	***	ns	ns	ns
Exact or approximate P value?	Gaussian Approximation	Gaussian Approximation	Gaussian Approximation	Gaussian Approximation	Gaussian Approximation	Gaussian Approximation	Gaussian Approximation	Gaussian Approximation	Gaussian Approximation	Gaussian Approximation	Gaussian Approximation
Is the correlation significant? (alpha=0.05)	No	No	No	No	Yes	Yes	Yes	Yes	No	No	No
Parameter	P15	CDH13	RIL-1	NOR1	NPM2	PGRA	PGRB	DPYS	AP2E108	ABL75	AGE
Number of XY Pairs	68	68	67	68	68	68	68	68	68	67	68
Spearman r	0.03718	0.06456	0.2334	-0.03558	0.1279	0.02739	0.1371	0.05069	1	-0.07074	-0.02365
95% confidence interval	-0.2100 to 0.2799	-0.1836 to 0.3050	-0.01456 to 0.4542	-0.2784 to 0.2115	-0.1211 to 0.3618	-0.2193 to 0.2708	-0.1120 to 0.3699	-0.1970 to 0.2923	1.000 to 1.000	-0.3124 to 0.1795	-0.2673 to 0.2229
P value (two-tailed)	0.7634	0.6009	0.0574	0.7733	0.2985	0.8245	0.2651	0.6814	P<0.0001	0.5695	0.8482
P value summary	ns	ns	ns	ns	ns	ns	ns	ns	***	ns	ns
Exact or approximate P value?	Gaussian Approximation	Gaussian Approximation	Gaussian Approximation	Gaussian Approximation	Gaussian Approximation	Gaussian Approximation	Gaussian Approximation	Gaussian Approximation	Gaussian Approximation	Gaussian Approximation	Gaussian Approximation
Is the correlation significant? (alpha=0.05)	No	No	No	No	No	No	No	No	Yes	No	No
Parameter	P15	CDH13	RIL-1	NOR1	NPM2	PGRA	PGRB	DPYS	AP2E108	ABL75	AGE
Number of XY Pairs	67	67	66	67	67	67	67	67	67	67	67
Spearman r	0.2359	-0.01924	0.0103	0.2558	0.3439	0.04501	0.01415	0.04057	-0.07074	1	-0.08529
95% confidence interval	-0.01182 to 0.4564	-0.2651 to 0.2289	-0.2393 to 0.2586	0.009355 to 0.4730	0.1059 to 0.5447	-0.2043 to 0.2889	-0.2338 to 0.2603	-0.2086 to 0.2848	-0.3124 to 0.1795	1.000 to 1.000	-0.3255 to 0.1653
P value (two-tailed)	0.0546	0.8772	0.9346	0.0366	0.0044	0.7176	0.9095	0.7444	0.5695	P<0.0001	0.4926
P value summary	ns	ns	ns	*	**	ns	ns	ns	ns	***	ns
Exact or approximate P value?	Gaussian Approximation	Gaussian Approximation	Gaussian Approximation	Gaussian Approximation	Gaussian Approximation	Gaussian Approximation	Gaussian Approximation	Gaussian Approximation	Gaussian Approximation	Gaussian Approximation	Gaussian Approximation
Is the correlation significant? (alpha=0.05)	No	No	No	Yes	Yes	No	No	No	No	Yes	No
Parameter	P15	CDH13	RIL-1	NOR1	NPM2	PGRA	PGRB	DPYS	AP2E108	ABL75	AGE
Number of XY Pairs	68	68	67	68	68	68	68	68	68	67	68
Spearman r	0.03209	0.1206	0.08496	0.09346	-0.1326	0.2127	-0.0326	0.1684	-0.02365	-0.08529	1
95% confidence interval	-0.2148 to 0.2752	-0.1285 to 0.3553	-0.1656 to 0.3252	-0.1553 to 0.3311	-0.3660 to 0.1164	-0.03438 to 0.4352	-0.2756 to 0.2144	-0.08012 to 0.3973	-0.2673 to 0.2229	-0.3255 to 0.1653	1.000 to 1.000
P value (two-tailed)	0.795	0.3274	0.4943	0.4484	0.2809	0.0817	0.7918	0.1697	0.8482	0.4926	P<0.0001
P value summary	ns	ns	ns	ns	ns	ns	ns	ns	ns	ns	***
Exact or approximate P value?	Gaussian Approximation	Gaussian Approximation	Gaussian Approximation	Gaussian Approximation	Gaussian Approximation	Gaussian Approximation	Gaussian Approximation	Gaussian Approximation	Gaussian Approximation	Gaussian Approximation	Gaussian Approximation
Is the correlation significant? (alpha=0.05)	No	No	No	No	No	No	No	No	No	No	Yes

## Sheet: BP
Parameter	P15	CDH13	RIL-1	NOR1	NPM2	PGRA	PGRB	DPYS	AP2E108	ABL75				P15	CDH13	RIL-1	NOR1	NPM2	PGRA	PGRB	DPYS	AP2E108	ABL75
Number of XY Pairs	23	23	23	23	23	23	23	23	23	23			P15	1	0.06515	0.5026	0.03454	0.5437	0.3091	-0.04438	0.5311	0.503	0.2668
Spearman r	1	0.06515	0.5026	0.03454	0.5437	0.3091	-0.04438	0.5311	0.503	0.2668				P<0.0001	0.7677	0.0145	0.8757	0.0073	0.1512	0.8407	0.0091	0.0144	0.2184
95% confidence interval	1.000 to 1.000	-0.3680 to 0.4751	0.1010 to 0.7633	-0.3942 to 0.4509	0.1568 to 0.7859	-0.1310 to 0.6474	-0.4588 to 0.3859	0.1394 to 0.7791	0.1017 to 0.7636	-0.1760 to 0.6199			CDH13	0.06515	1	0.2096	0.3674	0.5383	0.5196	-0.06111	0.1424	0.1621	0.122
P value (two-tailed)	P<0.0001	0.7677	0.0145	0.8757	0.0073	0.1512	0.8407	0.0091	0.0144	0.2184				0.7677	P<0.0001	0.337	0.0846	0.0081	0.011	0.7818	0.5169	0.46	0.5792
P value summary	***	ns	*	ns	**	ns	ns	**	*	ns			RIL-1	0.5026	0.2096	1	-0.07063	0.3698	0.3313	-0.004452	0.4108	0.3577	0.1393
Exact or approximate P value?	Gaussian Approximation	Gaussian Approximation	Gaussian Approximation	Gaussian Approximation	Gaussian Approximation	Gaussian Approximation	Gaussian Approximation	Gaussian Approximation	Gaussian Approximation	Gaussian Approximation				0.0145	0.337	P<0.0001	0.7488	0.0824	0.1226	0.9839	0.0515	0.0937	0.5262
Is the correlation significant? (alpha=0.05)	Yes	No	Yes	No	Yes	No	No	Yes	Yes	No			NOR1	0.03454	0.3674	-0.07063	1	0.2481	0.2646	-0.2106	0.3835	0.2975	-0.1115
														0.8757	0.0846	0.7488	P<0.0001	0.2537	0.2224	0.3349	0.0709	0.168	0.6124
Parameter	P15	CDH13	RIL-1	NOR1	NPM2	PGRA	PGRB	DPYS	AP2E108	ABL75			NPM2	0.5437	0.5383	0.3698	0.2481	1	0.3099	-0.4246	0.3059	0.333	0.3189
Number of XY Pairs	23	23	23	23	23	23	23	23	23	23				0.0073	0.0081	0.0824	0.2537	P<0.0001	0.1502	0.0435	0.1557	0.1205	0.1381
Spearman r	0.06515	1	0.2096	0.3674	0.5383	0.5196	-0.06111	0.1424	0.1621	0.122			PGRA	0.3091	0.5196	0.3313	0.2646	0.3099	1	-0.1332	0.4341	0.3786	0.3202
95% confidence interval	-0.3680 to 0.4751	1.000 to 1.000	-0.2341 to 0.5811	-0.06580 to 0.6841	0.1492 to 0.7830	0.1239 to 0.7728	-0.4719 to 0.3715	-0.2986 to 0.5333	-0.2801 to 0.5475	-0.3174 to 0.5182				0.1512	0.011	0.1226	0.2224	0.1502	P<0.0001	0.5446	0.0385	0.0749	0.1364
P value (two-tailed)	0.7677	P<0.0001	0.337	0.0846	0.0081	0.011	0.7818	0.5169	0.46	0.5792			PGRB	-0.04438	-0.06111	-0.004452	-0.2106	-0.4246	-0.1332	1	-0.09721	-0.2142	0.1231
P value summary	ns	***	ns	ns	**	*	ns	ns	ns	ns				0.8407	0.7818	0.9839	0.3349	0.0435	0.5446	P<0.0001	0.659	0.3265	0.5759
Exact or approximate P value?	Gaussian Approximation	Gaussian Approximation	Gaussian Approximation	Gaussian Approximation	Gaussian Approximation	Gaussian Approximation	Gaussian Approximation	Gaussian Approximation	Gaussian Approximation	Gaussian Approximation			DPYS	0.5311	0.1424	0.4108	0.3835	0.3059	0.4341	-0.09721	1	0.4176	0.3939
Is the correlation significant? (alpha=0.05)	No	Yes	No	No	Yes	Yes	No	No	No	No				0.0091	0.5169	0.0515	0.0709	0.1557	0.0385	0.659	P<0.0001	0.0474	0.0629
													AP2E108	0.503	0.1621	0.3577	0.2975	0.333	0.3786	-0.2142	0.4176	1	0.1538
Parameter	P15	CDH13	RIL-1	NOR1	NPM2	PGRA	PGRB	DPYS	AP2E108	ABL75				0.0144	0.46	0.0937	0.168	0.1205	0.0749	0.3265	0.0474	P<0.0001	0.4836
Number of XY Pairs	23	23	23	23	23	23	23	23	23	23			ABL75	0.2668	0.122	0.1393	-0.1115	0.3189	0.3202	0.1231	0.3939	0.1538	1
Spearman r	0.5026	0.2096	1	-0.07063	0.3698	0.3313	-0.004452	0.4108	0.3577	0.1393				0.2184	0.5792	0.5262	0.6124	0.1381	0.1364	0.5759	0.0629	0.4836	P<0.0001
95% confidence interval	0.1010 to 0.7633	-0.2341 to 0.5811	1.000 to 1.000	-0.4793 to 0.3632	-0.06305 to 0.6856	-0.1067 to 0.6616	-0.4266 to 0.4193	-0.01478 to 0.7103	-0.07688 to 0.6781	-0.3015 to 0.5310
P value (two-tailed)	0.0145	0.337	P<0.0001	0.7488	0.0824	0.1226	0.9839	0.0515	0.0937	0.5262
P value summary	*	ns	***	ns	ns	ns	ns	ns	ns	ns
Exact or approximate P value?	Gaussian Approximation	Gaussian Approximation	Gaussian Approximation	Gaussian Approximation	Gaussian Approximation	Gaussian Approximation	Gaussian Approximation	Gaussian Approximation	Gaussian Approximation	Gaussian Approximation
Is the correlation significant? (alpha=0.05)	Yes	No	Yes	No	No	No	No	No	No	No
Parameter	P15	CDH13	RIL-1	NOR1	NPM2	PGRA	PGRB	DPYS	AP2E108	ABL75
Number of XY Pairs	23	23	23	23	23	23	23	23	23	23
Spearman r	0.03454	0.3674	-0.07063	1	0.2481	0.2646	-0.2106	0.3835	0.2975	-0.1115
95% confidence interval	-0.3942 to 0.4509	-0.06580 to 0.6841	-0.4793 to 0.3632	1.000 to 1.000	-0.1954 to 0.6073	-0.1783 to 0.6184	-0.5817 to 0.2332	-0.04714 to 0.6939	-0.1436 to 0.6400	-0.5104 to 0.3269
P value (two-tailed)	0.8757	0.0846	0.7488	P<0.0001	0.2537	0.2224	0.3349	0.0709	0.168	0.6124
P value summary	ns	ns	ns	***	ns	ns	ns	ns	ns	ns
Exact or approximate P value?	Gaussian Approximation	Gaussian Approximation	Gaussian Approximation	Gaussian Approximation	Gaussian Approximation	Gaussian Approximation	Gaussian Approximation	Gaussian Approximation	Gaussian Approximation	Gaussian Approximation
Is the correlation significant? (alpha=0.05)	No	No	No	Yes	No	No	No	No	No	No
Parameter	P15	CDH13	RIL-1	NOR1	NPM2	PGRA	PGRB	DPYS	AP2E108	ABL75
Number of XY Pairs	23	23	23	23	23	23	23	23	23	23
Spearman r	0.5437	0.5383	0.3698	0.2481	1	0.3099	-0.4246	0.3059	0.333	0.3189
95% confidence interval	0.1568 to 0.7859	0.1492 to 0.7830	-0.06305 to 0.6856	-0.1954 to 0.6073	1.000 to 1.000	-0.1302 to 0.6479	-0.7185 to -0.001928	-0.1344 to 0.6454	-0.1047 to 0.6627	-0.1203 to 0.6537
P value (two-tailed)	0.0073	0.0081	0.0824	0.2537	P<0.0001	0.1502	0.0435	0.1557	0.1205	0.1381
P value summary	**	**	ns	ns	***	ns	*	ns	ns	ns
Exact or approximate P value?	Gaussian Approximation	Gaussian Approximation	Gaussian Approximation	Gaussian Approximation	Gaussian Approximation	Gaussian Approximation	Gaussian Approximation	Gaussian Approximation	Gaussian Approximation	Gaussian Approximation
Is the correlation significant? (alpha=0.05)	Yes	Yes	No	No	Yes	No	Yes	No	No	No
Parameter	P15	CDH13	RIL-1	NOR1	NPM2	PGRA	PGRB	DPYS	AP2E108	ABL75
Number of XY Pairs	23	23	23	23	23	23	23	23	23	23
Spearman r	0.3091	0.5196	0.3313	0.2646	0.3099	1	-0.1332	0.4341	0.3786	0.3202
95% confidence interval	-0.1310 to 0.6474	0.1239 to 0.7728	-0.1067 to 0.6616	-0.1783 to 0.6184	-0.1302 to 0.6479	1.000 to 1.000	-0.5265 to 0.3071	0.01358 to 0.7241	-0.05288 to 0.6909	-0.1189 to 0.6545
P value (two-tailed)	0.1512	0.011	0.1226	0.2224	0.1502	P<0.0001	0.5446	0.0385	0.0749	0.1364
P value summary	ns	*	ns	ns	ns	***	ns	*	ns	ns
Exact or approximate P value?	Gaussian Approximation	Gaussian Approximation	Gaussian Approximation	Gaussian Approximation	Gaussian Approximation	Gaussian Approximation	Gaussian Approximation	Gaussian Approximation	Gaussian Approximation	Gaussian Approximation
Is the correlation significant? (alpha=0.05)	No	Yes	No	No	No	Yes	No	Yes	No	No
Parameter	P15	CDH13	RIL-1	NOR1	NPM2	PGRA	PGRB	DPYS	AP2E108	ABL75
Number of XY Pairs	23	23	23	23	23	23	23	23	23	23
Spearman r	-0.04438	-0.06111	-0.004452	-0.2106	-0.4246	-0.1332	1	-0.09721	-0.2142	0.1231
95% confidence interval	-0.4588 to 0.3859	-0.4719 to 0.3715	-0.4266 to 0.4193	-0.5817 to 0.2332	-0.7185 to -0.001928	-0.5265 to 0.3071	1.000 to 1.000	-0.4997 to 0.3398	-0.5842 to 0.2296	-0.3164 to 0.5190
P value (two-tailed)	0.8407	0.7818	0.9839	0.3349	0.0435	0.5446	P<0.0001	0.659	0.3265	0.5759
P value summary	ns	ns	ns	ns	*	ns	***	ns	ns	ns
Exact or approximate P value?	Gaussian Approximation	Gaussian Approximation	Gaussian Approximation	Gaussian Approximation	Gaussian Approximation	Gaussian Approximation	Gaussian Approximation	Gaussian Approximation	Gaussian Approximation	Gaussian Approximation
Is the correlation significant? (alpha=0.05)	No	No	No	No	Yes	No	Yes	No	No	No
Parameter	P15	CDH13	RIL-1	NOR1	NPM2	PGRA	PGRB	DPYS	AP2E108	ABL75
Number of XY Pairs	23	23	23	23	23	23	23	23	23	23
Spearman r	0.5311	0.1424	0.4108	0.3835	0.3059	0.4341	-0.09721	1	0.4176	0.3939
95% confidence interval	0.1394 to 0.7791	-0.2986 to 0.5333	-0.01478 to 0.7103	-0.04714 to 0.6939	-0.1344 to 0.6454	0.01358 to 0.7241	-0.4997 to 0.3398	1.000 to 1.000	-0.006529 to 0.7144	-0.03495 to 0.7002
P value (two-tailed)	0.0091	0.5169	0.0515	0.0709	0.1557	0.0385	0.659	P<0.0001	0.0474	0.0629
P value summary	**	ns	ns	ns	ns	*	ns	***	*	ns
Exact or approximate P value?	Gaussian Approximation	Gaussian Approximation	Gaussian Approximation	Gaussian Approximation	Gaussian Approximation	Gaussian Approximation	Gaussian Approximation	Gaussian Approximation	Gaussian Approximation	Gaussian Approximation
Is the correlation significant? (alpha=0.05)	Yes	No	No	No	No	Yes	No	Yes	Yes	No
Parameter	P15	CDH13	RIL-1	NOR1	NPM2	PGRA	PGRB	DPYS	AP2E108	ABL75
Number of XY Pairs	23	23	23	23	23	23	23	23	23	23
Spearman r	0.503	0.1621	0.3577	0.2975	0.333	0.3786	-0.2142	0.4176	1	0.1538
95% confidence interval	0.1017 to 0.7636	-0.2801 to 0.5475	-0.07688 to 0.6781	-0.1436 to 0.6400	-0.1047 to 0.6627	-0.05288 to 0.6909	-0.5842 to 0.2296	-0.006529 to 0.7144	1.000 to 1.000	-0.2879 to 0.5416
P value (two-tailed)	0.0144	0.46	0.0937	0.168	0.1205	0.0749	0.3265	0.0474	P<0.0001	0.4836
P value summary	*	ns	ns	ns	ns	ns	ns	*	***	ns
Exact or approximate P value?	Gaussian Approximation	Gaussian Approximation	Gaussian Approximation	Gaussian Approximation	Gaussian Approximation	Gaussian Approximation	Gaussian Approximation	Gaussian Approximation	Gaussian Approximation	Gaussian Approximation
Is the correlation significant? (alpha=0.05)	Yes	No	No	No	No	No	No	Yes	Yes	No
Parameter	P15	CDH13	RIL-1	NOR1	NPM2	PGRA	PGRB	DPYS	AP2E108	ABL75
Number of XY Pairs	23	23	23	23	23	23	23	23	23	23
Spearman r	0.2668	0.122	0.1393	-0.1115	0.3189	0.3202	0.1231	0.3939	0.1538	1
95% confidence interval	-0.1760 to 0.6199	-0.3174 to 0.5182	-0.3015 to 0.5310	-0.5104 to 0.3269	-0.1203 to 0.6537	-0.1189 to 0.6545	-0.3164 to 0.5190	-0.03495 to 0.7002	-0.2879 to 0.5416	1.000 to 1.000
P value (two-tailed)	0.2184	0.5792	0.5262	0.6124	0.1381	0.1364	0.5759	0.0629	0.4836	P<0.0001
P value summary	ns	ns	ns	ns	ns	ns	ns	ns	ns	***
Exact or approximate P value?	Gaussian Approximation	Gaussian Approximation	Gaussian Approximation	Gaussian Approximation	Gaussian Approximation	Gaussian Approximation	Gaussian Approximation	Gaussian Approximation	Gaussian Approximation	Gaussian Approximation
Is the correlation significant? (alpha=0.05)	No	No	No	No	No	No	No	No	No	Yes
Parameter	P15	CDH13	RIL-1	NOR1	NPM2	PGRA	PGRB	DPYS	AP2E108	ABL75	AGE
Number of XY Pairs	23	23	23	23	23	23	23	23	23	23	23
Spearman r	-0.0798	-0.2278	0.03144	-0.08047	-0.3957	0.1816	0.3075	-0.07279	0.1576	0.05204	1
95% confidence interval	-0.4864 to 0.3552	-0.5936 to 0.2160	-0.3968 to 0.4485	-0.4869 to 0.3546	-0.7013 to 0.03274	-0.2615 to 0.5615	-0.1328 to 0.6464	-0.4810 to 0.3613	-0.2843 to 0.5443	-0.3793 to 0.4648	1.000 to 1.000
P value (two-tailed)	0.7174	0.2958	0.8867	0.7151	0.0616	0.407	0.1535	0.7414	0.4726	0.8136	P<0.0001
P value summary	ns	ns	ns	ns	ns	ns	ns	ns	ns	ns	***
Exact or approximate P value?	Gaussian Approximation	Gaussian Approximation	Gaussian Approximation	Gaussian Approximation	Gaussian Approximation	Gaussian Approximation	Gaussian Approximation	Gaussian Approximation	Gaussian Approximation	Gaussian Approximation	Gaussian Approximation
Is the correlation significant? (alpha=0.05)	No	No	No	No	No	No	No	No	No	No	Yes

## Sheet: Sheet2
Supplementary Table 6: Spearman correlation between methylation of different genes.
In each cell, the top number is the correlation coefficient r. The bottom number is a P value.
To correct for multiple comparisons, P<.001 was considered significant.
All Pts	CDKN2B	CDH13	PDLIM4	OSCP1	NPM2	PGR-A	PGR-B	DPYS	TFAP2E	ABL1
CDKN2B		0.1378	0.2591	0.09627	0.2812	0.3281	0.2298	0.2995	0.1675	0.1954
		0.1178	0.003	0.2759	0.0012	0.0001	0.0085	0.0005	0.0568	0.0264
CDH13	0.1378		0.2044	0.2076	0.2177	0.5139	0.2779	0.3141	0.2313	0.0092
	0.1178		0.0202	0.0178	0.0129	< 0.0001	0.0014	0.0003	0.0081	0.9176
PDLIM4	0.2591	0.2044		0.2623	0.2353	0.1688	0.2701	0.2336	0.2828	0.07638
	0.003	0.0202		0.0027	0.0073	0.0559	0.002	0.0077	0.0012	0.3915
OSCP1	0.09627	0.2076	0.2623		0.3019	0.2231	0.3547	0.2326	0.1952	0.1462
	0.2759	0.0178	0.0027		0.0005	0.0107	< 0.0001	0.0078	0.026	0.0984
NPM2	0.2812	0.2177	0.2353	0.3019		0.06703	0.1252	0.37	0.2281	0.3622
	0.0012	0.0129	0.0073	0.0005		0.4486	0.1559	< 0.0001	0.0091	< 0.0001
PGR-A	0.3281	0.5139	0.1688	0.2231	0.06703		0.401	0.3868	0.1715	0.112
	0.0001	< 0.0001	0.0559	0.0107	0.4486		< 0.0001	< 0.0001	0.051	0.2063
PGR-B	0.2298	0.2779	0.2701	0.3547	0.1252	0.401		0.2926	0.1276	0.1134
	0.0085	0.0014	0.002	< 0.0001	0.1559	< 0.0001		0.0007	0.1478	0.2006
DPYS	0.2995	0.3141	0.2336	0.2326	0.37	0.3868	0.2926		0.2891	0.1617
	0.0005	0.0003	0.0077	0.0078	< 0.0001	< 0.0001	0.0007		0.0008	0.0671
TFAP2E	0.1675	0.2313	0.2828	0.1952	0.2281	0.1715	0.1276	0.2891		0.04987
	0.0568	0.0081	0.0012	0.026	0.0091	0.051	0.1478	0.0008		0.5746
ABL1	0.05725	0.222	0.1546	0.4003	0.2037	0.2769	0.06094	0.2935	0.3467
	0.5363	0.0152	0.0946	< 0.0001	0.0263	0.0023	0.5103	0.0012	0.0001
CP	CDKN2B	CDH13	PDLIM4	OSCP1	NPM2	PGR-A	PGR-B	DPYS	TFAP2E	ABL1
CDKN2B		0.207	0.1458	0.2086	0.1679	0.3693	0.3322	0.1773	0.03718	0.2359
		0.0903	0.2392	0.0878	0.1711	0.0019	0.0057	0.1481	0.7634	0.0546
CDH13	0.207		0.08096	0.0526	0.07948	0.4781	0.2115	0.2042	0.06456	-0.01924
	0.0903		0.5149	0.6701	0.5194	<0.0001	0.0833	0.0949	0.6009	0.8772
PDLIM4	0.1458	0.08096		0.1111	0.1378	0.05895	0.1126	0.02581	0.2334	0.0103
	0.2392	0.5149		0.3709	0.2661	0.6356	0.3645	0.8357	0.0574	0.9346
OSCP1	0.2086	0.0526	0.1111		0.3137	0.09823	0.2409	-0.08469	-0.03558	0.2558
	0.0878	0.6701	0.3709		0.0092	0.4255	0.0478	0.4923	0.7733	0.0366
NPM2	0.1679	0.07948	0.1378	0.3137		-0.05189	0.2874	0.259	0.1279	0.3439
	0.1711	0.5194	0.2661	0.0092		0.6743	0.0175	0.0329	0.2985	0.0044
PGR-A	0.3693	0.4781	0.05895	0.09823	-0.05189		0.2386	0.2987	0.02739	0.04501
	0.0019	<0.0001	0.6356	0.4255	0.6743		0.0501	0.0134	0.8245	0.7176
PGR-B	0.3322	0.2115	0.1126	0.2409	0.2874	0.2386		0.2416	0.1371	0.01415
	0.0057	0.0833	0.3645	0.0478	0.0175	0.0501		0.0471	0.2651	0.9095
DPYS	0.1773	0.2042	0.02581	-0.08469	0.259	0.2987	0.2416		0.05069	0.04057
	0.1481	0.0949	0.8357	0.4923	0.0329	0.0134	0.0471		0.6814	0.7444
TFAP2E	0.03718	0.06456	0.2334	-0.03558	0.1279	0.02739	0.1371	0.05069		-0.07074
	0.7634	0.6009	0.0574	0.7733	0.2985	0.8245	0.2651	0.6814		0.5695
ABL1	-0.01259	-0.1184	-0.04514	0.2505	-0.05479	0.1208	-0.09705	-0.0944	0.0255
	0.9213	0.3513	0.7254	0.0459	0.6672	0.3415	0.4455	0.4581	0.8414
AP	CDKN2B	CDH13	PDLIM4	OSCP1	NPM2	PGR-A	PGR-B	DPYS	TFAP2E	ABL1
CDKN2B		-0.008776	0.2326	-0.03297	0.2586	0.3021	0.3776	0.3427	0.07165	0.03631
		0.9577	0.1541	0.8421	0.1119	0.0616	0.0178	0.0327	0.6647	0.8263
CDH13	-0.008776		0.08866	-0.09784	-0.06665	0.4163	0.01667	0.2113	0.216	-0.2057
	0.9577		0.5915	0.5535	0.6868	0.0084	0.9198	0.1966	0.1867	0.2091
PDLIM4	0.2326	0.08866		0.4071	0.1918	0.001881	0.3437	0.1975	0.1794	0.097
	0.1541	0.5915		0.0101	0.242	0.9909	0.0321	0.2281	0.2745	0.5569
OSCP1	-0.03297	-0.09784	0.4071		0.09623	0.01927	0.2704	0.3191	0.3797	0.07021
	0.8421	0.5535	0.0101		0.5601	0.9073	0.0959	0.0477	0.0171	0.6711
NPM2	0.2586	-0.06665	0.1918	0.09623		-0.174	-0.06294	0.3238	0.1523	0.3215
	0.1119	0.6868	0.242	0.5601		0.2895	0.7035	0.0443	0.3545	0.046
PGR-A	0.3021	0.4163	0.001881	0.01927	-0.174		0.5915	0.3328	0.08687	0.05022
	0.0616	0.0084	0.9909	0.9073	0.2895		<0.0001	0.0385	0.599	0.7614
PGR-B	0.3776	0.01667	0.3437	0.2704	-0.06294	0.5915		0.2833	-0.004769	0.1802
	0.0178	0.9198	0.0321	0.0959	0.7035	<0.0001		0.0805	0.977	0.2724
DPYS	0.3427	0.2113	0.1975	0.3191	0.3238	0.3328	0.2833		0.3279	0.03345
	0.0327	0.1966	0.2281	0.0477	0.0443	0.0385	0.0805		0.0416	0.8398
TFAP2E	0.07165	0.216	0.1794	0.3797	0.1523	0.08687	-0.004769	0.3279		0.03577
	0.6647	0.1867	0.2745	0.0171	0.3545	0.599	0.977	0.0416		0.8288
ABL1	-0.04456	0.2827	0.287	0.3533	0.2559	0.2274	0.0379	0.4394	0.4578
	0.7848	0.0771	0.0726	0.0253	0.111	0.1582	0.8164	0.0046	0.003
BC	CDKN2B	CDH13	PDLIM4	OSCP1	NPM2	PGR-A	PGR-B	DPYS	TFAP2E	ABL1
CDKN2B		0.06515	0.5026	0.03454	0.5437	0.3091	-0.04438	0.5311	0.503	0.2668
		0.7677	0.0145	0.8757	0.0073	0.1512	0.8407	0.0091	0.0144	0.2184
CDH13	0.06515		0.2096	0.3674	0.5383	0.5196	-0.06111	0.1424	0.1621	0.122
	0.7677		0.337	0.0846	0.0081	0.011	0.7818	0.5169	0.46	0.5792
PDLIM4	0.5026	0.2096		-0.07063	0.3698	0.3313	-0.004452	0.4108	0.3577	0.1393
	0.0145	0.337		0.7488	0.0824	0.1226	0.9839	0.0515	0.0937	0.5262
OSCP1	0.03454	0.3674	-0.07063		0.2481	0.2646	-0.2106	0.3835	0.2975	-0.1115
	0.8757	0.0846	0.7488		0.2537	0.2224	0.3349	0.0709	0.168	0.6124
NPM2	0.5437	0.5383	0.3698	0.2481		0.3099	-0.4246	0.3059	0.333	0.3189
	0.0073	0.0081	0.0824	0.2537		0.1502	0.0435	0.1557	0.1205	0.1381
PGR-A	0.3091	0.5196	0.3313	0.2646	0.3099		-0.1332	0.4341	0.3786	0.3202
	0.1512	0.011	0.1226	0.2224	0.1502		0.5446	0.0385	0.0749	0.1364
PGR-B	-0.04438	-0.06111	-0.004452	-0.2106	-0.4246	-0.1332		-0.09721	-0.2142	0.1231
	0.8407	0.7818	0.9839	0.3349	0.0435	0.5446		0.659	0.3265	0.5759
DPYS	0.5311	0.1424	0.4108	0.3835	0.3059	0.4341	-0.09721		0.4176	0.3939
	0.0091	0.5169	0.0515	0.0709	0.1557	0.0385	0.659		0.0474	0.0629
TFAP2E	0.503	0.1621	0.3577	0.2975	0.333	0.3786	-0.2142	0.4176		0.1538
	0.0144	0.46	0.0937	0.168	0.1205	0.0749	0.3265	0.0474		0.4836
ABL1	0.1643	0.6	0.06434	0.3286	0.3429	0.5571	-0.1643	0.4714	0.6786
	0.5585	0.0181	0.8198	0.2318	0.2109	0.031	0.5585	0.0761	0.0054
